# Supplementary material for: Sensitivities of Amazonian clouds to aerosols and updraft speed
Source: Copernicus journal article supplement (doi:10.5194/acp-2017-89), 2017-03-01
Supplement: Supplementary file 1 [file acp-2017-89-supplement.pdf]

# Supplement to: Sensitivities of Amazonian clouds to aerosols and updraft speed

By Micael A. Cecchini<sup>1</sup>, Luiz A. T. Machado<sup>1</sup>, Meinrat O. Andreae<sup>2,12</sup>, Scot T. Martin<sup>3</sup>, Rachel I. Albrecht<sup>4</sup>, Paulo Artaxo<sup>5</sup>, Henrique M. J. Barbosa<sup>5</sup>, Stephan Borrmann<sup>2,6</sup>, Daniel Fütterer<sup>7</sup>, Tina Jurkat<sup>7</sup>, Christoph Mahnke<sup>2,6</sup>, Andreas Minikin<sup>8</sup>, Sergej Molleker<sup>6</sup>, Mira L. Pöhlker<sup>2</sup>, Ulrich Pöschl<sup>2</sup>, Daniel Rosenfeld<sup>9</sup>, Christiane Voigt<sup>6,7</sup>, Bernadett Weinzierl<sup>7,10</sup>, Manfred Wendisch<sup>11</sup>

<sup>1</sup>Centro de Previsão de Tempo e Estudos Climáticos, Instituto Nacional de Pesquisas Espaciais, Cachoeira Paulista, Brasil.

<sup>2</sup>Biogeochemistry, Multiphase Chemistry, and Particle Chemistry Departments, Max Planck Institute for Chemistry, P.O. Box 3060, 55020, Mainz, Germany.

10 <sup>3</sup>School of Engineering and Applied Sciences and Department of Earth and Planetary Sciences, Harvard University, Cambridge, Massachusetts, USA.

<sup>4</sup>Departamento de Ciências Atmosféricas, Instituto de Astronomia, Geofísica e Ciências Atmosféricas (IAG), Universidade de São Paulo (USP), Brasil.

<sup>5</sup>Instituto de Física (IF), Universidade de São Paulo (USP), São Paulo, Brasil.

15 <sup>6</sup>Institut für Physik der Atmosphäre (IPA), Johannes Gutenberg-Universität, Mainz, Deutschland.

<sup>7</sup>Institut für Physik der Atmosphäre, Deutsches Zentrum für Luft- und Raumfahrt (DLR), Oberpfaffenhofen, 82234 Wessling, Deutschland.

<sup>8</sup>Flugexperimente, Deutsches Zentrum für Luft- und Raumfahrt (DLR), Oberpfaffenhofen, Deutschland.

<sup>9</sup>Institute of Earth Sciences, The Hebrew University of Jerusalem, Israel.

20 <sup>10</sup>Faculty of Physics, University of Vienna, Boltzmannngasse 5, 1090 Wien, Austria.

<sup>11</sup>Leipziger Institut für Meteorologie (LIM), Universität Leipzig, Stephanstr. 3, 04103 Leipzig, Deutschland.

<sup>12</sup>Scripps Institution of Oceanography, University of California San Diego, La Jolla, CA92093, USA.

*Correspondence to:* M. A. Cecchini (micael.cecchini@cptec.inpe.br)

## DSD profiles for each flight

25 Figures S1-4 show the individual DSD profiles for each flight considered in this study. It clearly shows the cohesiveness of the aerosol effect on the vertical structure of the warm-phase. Altitudes shown are relative to cloud base.

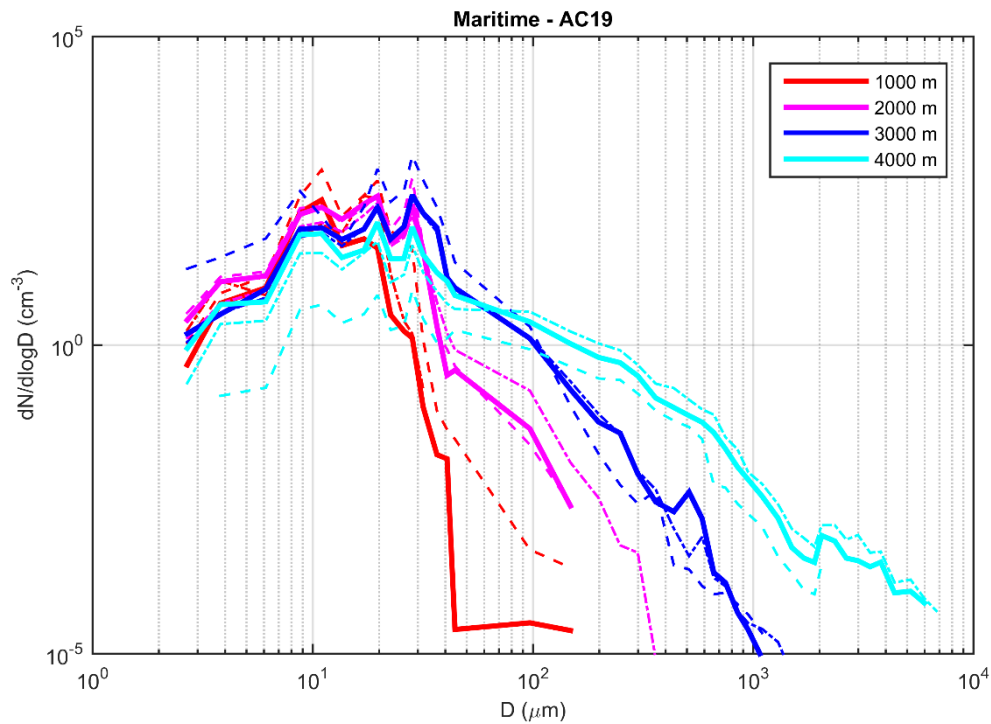

**Figure S1.** Droplet size distributions as function of altitude above cloud base, aerosol particle number concentration, and vertical wind speed,  $W$ , for flight AC19. Four 1000-m-thick layers are considered in the vertical, where the legends in the graphs show the respective upper limit of each one. Solid lines represent averaged DSDs for  $-1 \text{ m s}^{-1} \leq W \leq 1 \text{ m s}^{-1}$ , i.e., for relatively neutral vertical movements. Dashed lines represent averaged DSDs for the updraft regions where  $W > 1 \text{ m s}^{-1}$ , and dot-dashed lines represent the downdrafts ( $W < -1 \text{ m s}^{-1}$ ).

5

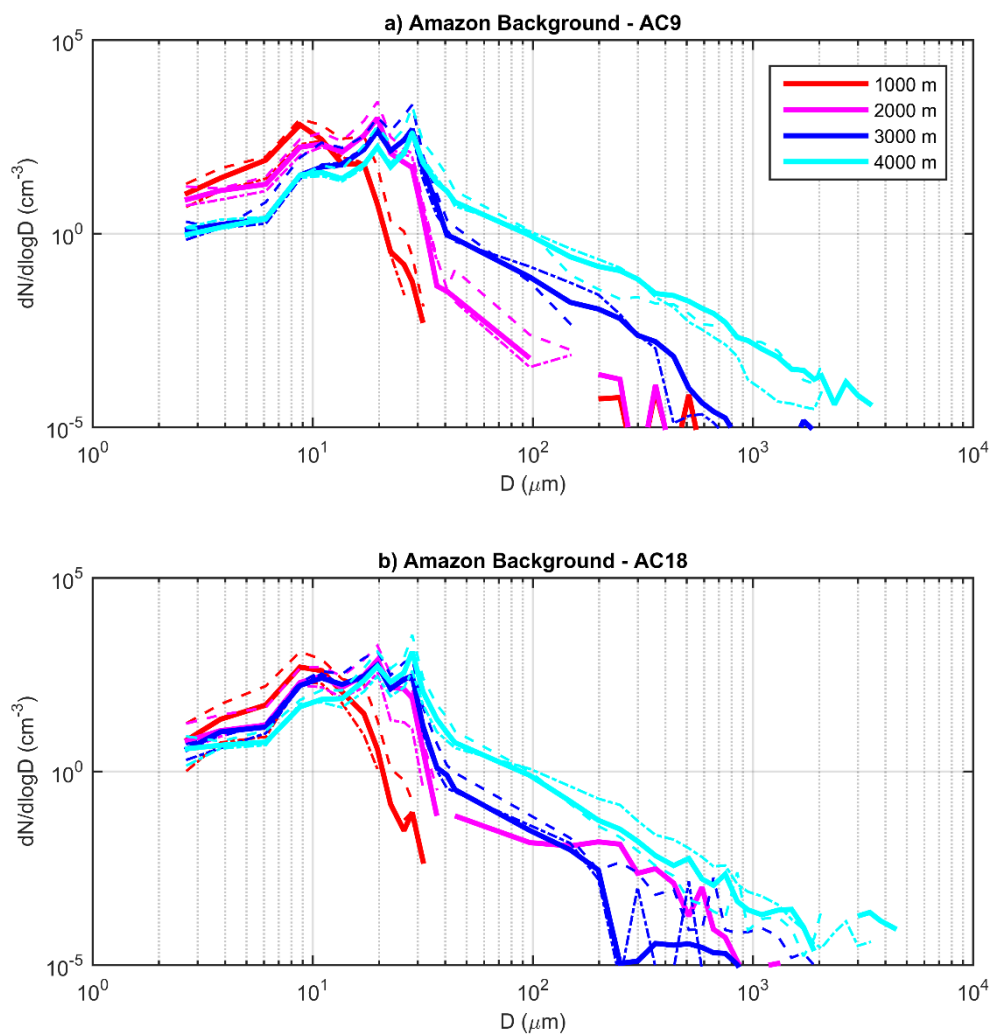

**Figure S2.** Droplet size distributions as function of altitude above cloud base, aerosol particle number concentration, and vertical wind speed,  $W$ , for flights a) AC9 and b) AC18. Four 1000-m-thick layers are considered in the vertical, where the legends in the graphs show the respective upper limit of each one. Solid lines represent averaged DSDs for  $-1 \text{ m s}^{-1} \leq W \leq 1 \text{ m s}^{-1}$ , i.e., for relatively neutral vertical movements. Dashed lines represent averaged DSDs for the updraft regions where  $W > 1 \text{ m s}^{-1}$ , and dot-dashed lines represent the downdrafts ( $W < -1 \text{ m s}^{-1}$ ).

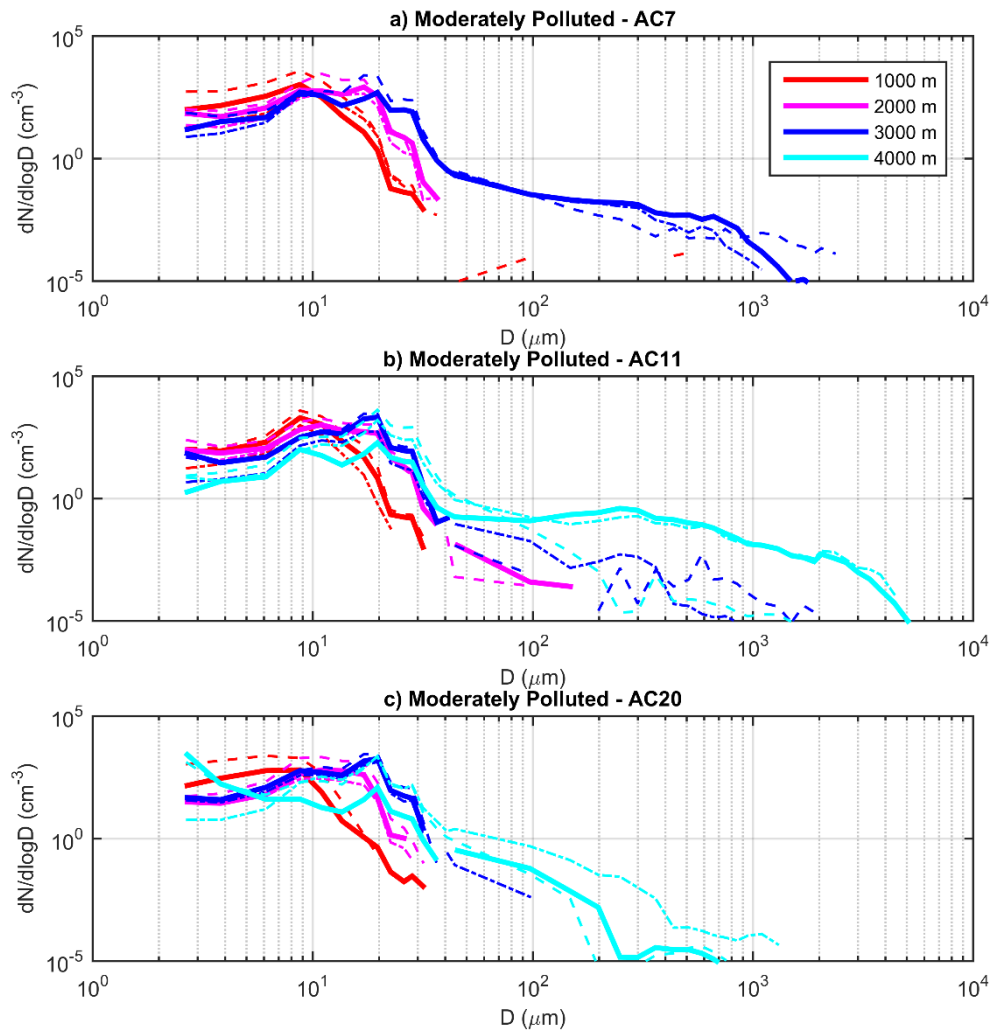

**Figure S3.** Droplet size distributions as function of altitude above cloud base, aerosol particle number concentration, and vertical wind speed,  $W$ , for flights a) AC7, b) AC11, and c) AC20. Four 1000-m-thick layers are considered in the vertical, where the legends in the graphs show the respective upper limit of each one. Solid lines represent averaged DSDs for  $-1 \text{ m s}^{-1} \leq W \leq 1 \text{ m s}^{-1}$ , i.e., for relatively neutral vertical movements. Dashed lines represent averaged DSDs for the updraft regions where  $W > 1 \text{ m s}^{-1}$ , and dot-dashed lines represent the downdrafts ( $W < -1 \text{ m s}^{-1}$ ).

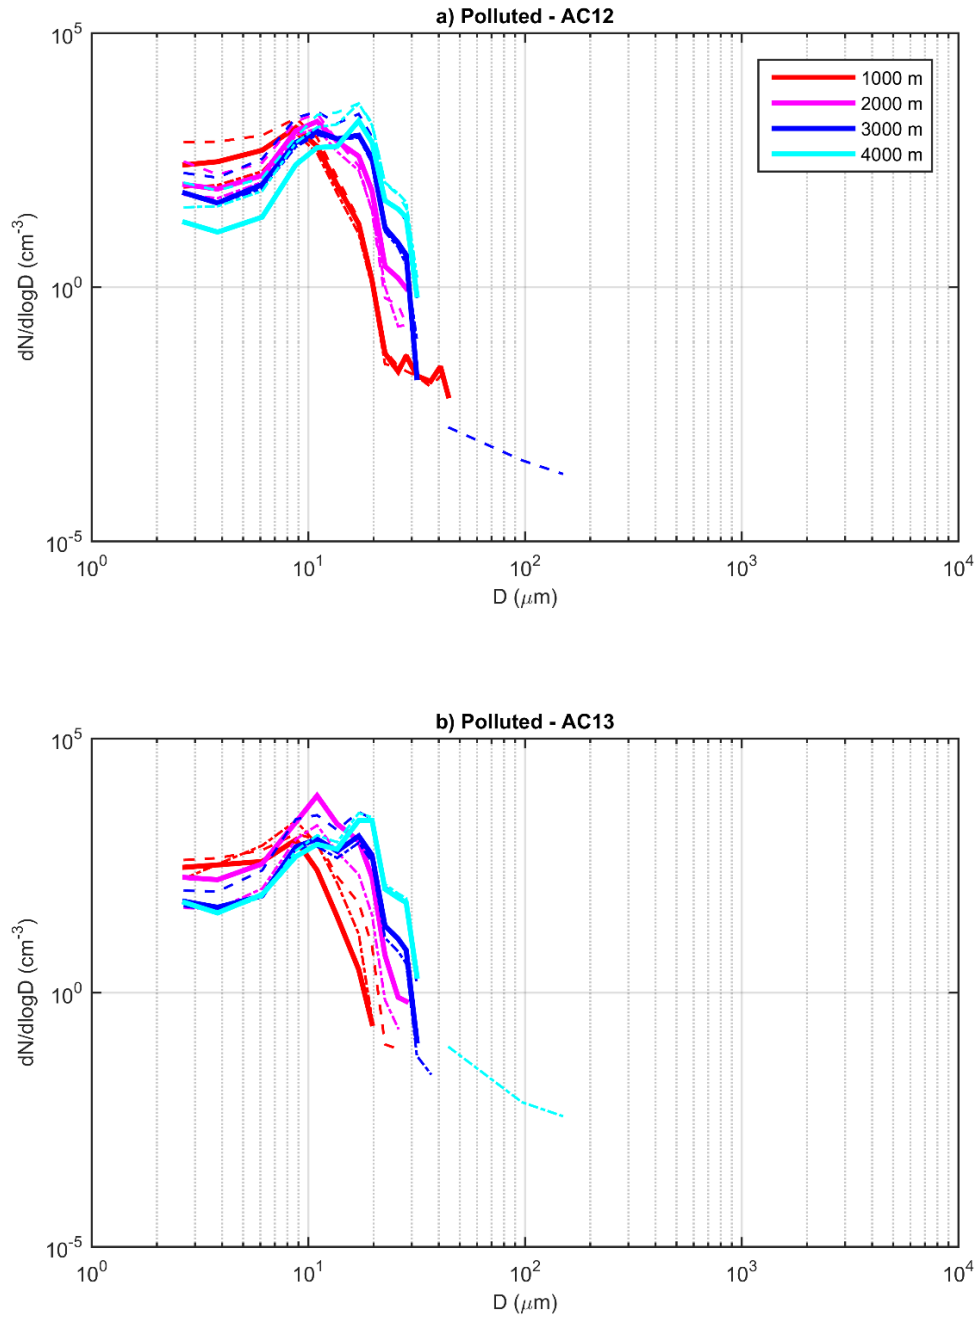

**Figure S4.** Droplet size distributions as function of altitude above cloud base, aerosol particle number concentration, and vertical wind speed,  $W$ , for flights a) AC12 and b) AC13. Four 1000-m-thick layers are considered in the vertical, where the legends in the graphs show the respective upper limit of each one. Solid lines represent averaged DSDs for  $-1 \text{ m s}^{-1} \leq W \leq 1 \text{ m s}^{-1}$ , i.e., for relatively neutral vertical movements. Dashed lines represent averaged DSDs for the updraft regions where  $W > 1 \text{ m s}^{-1}$ , and dot-dashed lines represent the downdrafts ( $W < -1 \text{ m s}^{-1}$ ).

### Sensitivities for individual intervals

By fixing two dimensions in the 3D matrices and varying the third, we can obtain individual sensitivities in the form of the Equation 1 in the manuscript. As an example, we can fix both  $w$  and  $H$  and obtain the sensitivities of DSD parameters to varying  $N_a$ . By using the natural logarithm scale and applying a linear fit, we obtain the sensitivity as the angular coefficient and the  $R^2$  parameter is a measure of the significance of the relation. By calculating every possible combination, we obtain Tables S1-15 shown below. The amount of 1 Hz data for each sensitivity are shown in Tables S16-18.

| $w$ (m s <sup>-1</sup> ) \ $H$ (m) | <b>200</b>                     | <b>500</b>                     | <b>950</b>                     | <b>1625</b>                    | <b>2637.5</b>                  | <b>4156.25</b>                 |
|------------------------------------|--------------------------------|--------------------------------|--------------------------------|--------------------------------|--------------------------------|--------------------------------|
| <b>0.5</b>                         | -0.11<br>R <sup>2</sup> = 0.85 | -0.27<br>R <sup>2</sup> = 0.96 | -0.25<br>R <sup>2</sup> = 0.99 | -0.23<br>R <sup>2</sup> = 0.94 | -0.38<br>R <sup>2</sup> = 0.97 | -0.47<br>R <sup>2</sup> = 0.71 |
| <b>1</b>                           | -0.13<br>R <sup>2</sup> = 0.84 | -0.26<br>R <sup>2</sup> = 0.93 | -0.30<br>R <sup>2</sup> = 0.99 | -0.18<br>R <sup>2</sup> = 0.86 | -0.25<br>R <sup>2</sup> = 1.00 | -0.26<br>R <sup>2</sup> = 0.96 |
| <b>2</b>                           | -0.16<br>R <sup>2</sup> = 0.79 | -0.26<br>R <sup>2</sup> = 0.98 | -0.28<br>R <sup>2</sup> = 0.91 | -0.17<br>R <sup>2</sup> = 0.64 | -0.31<br>R <sup>2</sup> = 0.98 | -0.16<br>R <sup>2</sup> = 0.53 |
| <b>4</b>                           | -0.18<br>R <sup>2</sup> = 0.82 | -0.28<br>R <sup>2</sup> = 0.95 | -0.25<br>R <sup>2</sup> = 0.96 | -0.25<br>R <sup>2</sup> = 0.95 | -0.31<br>R <sup>2</sup> = 0.95 | -0.28<br>R <sup>2</sup> = 0.99 |
| <b>8</b>                           | -                              | -                              | -                              | -                              | -0.26<br>R <sup>2</sup> = 0.80 | -0.33<br>R <sup>2</sup> = 0.98 |

**Table S1.** sensitivities of  $D_{eff}$  to  $N_a$  -  $S_{D_{eff}}(N_a) = \frac{\partial \ln D_{eff}}{\partial \ln N_a} \Big|_{w,H}$ . Intervals upper limits are highlighted in bold letters.

10

| $N_a$ (cm <sup>-3</sup> ) \ $H$ (m) | <b>200</b>                      | <b>500</b>                     | <b>950</b>                       | <b>1625</b>                      | <b>2637.5</b>                     | <b>4156.25</b>                    |
|-------------------------------------|---------------------------------|--------------------------------|----------------------------------|----------------------------------|-----------------------------------|-----------------------------------|
| <b>500</b>                          | 0.020<br>R <sup>2</sup> = 0.63  | 0.049<br>R <sup>2</sup> = 0.61 | 0.048<br>R <sup>2</sup> = 0.90   | -0.018<br>R <sup>2</sup> = 0.034 | 0.032<br>R <sup>2</sup> = 0.77    | -                                 |
| <b>1000</b>                         | 0.018<br>R <sup>2</sup> = 0.17  | 0.031<br>R <sup>2</sup> = 0.57 | 0.0072<br>R <sup>2</sup> = 0.029 | 0.046<br>R <sup>2</sup> = 0.71   | 0.0032<br>R <sup>2</sup> = 0.0040 | 0.0034<br>R <sup>2</sup> = 0.0010 |
| <b>3000</b>                         | 0.031<br>R <sup>2</sup> = 0.90  | 0.044<br>R <sup>2</sup> = 0.69 | -                                | -0.011<br>R <sup>2</sup> = 0.055 | 0.13<br>R <sup>2</sup> = 0.93     | 0.18<br>R <sup>2</sup> = 0.72     |
| <b>4500</b>                         | -0.085<br>R <sup>2</sup> = 0.97 | 0.013<br>R <sup>2</sup> = 0.57 | 0.046<br>R <sup>2</sup> = 0.62   | -0.0063<br>R <sup>2</sup> = 0.23 | 0.021<br>R <sup>2</sup> = 0.44    | 0.024<br>R <sup>2</sup> = 0.48    |

**Table S2.** sensitivities of  $D_{eff}$  to  $w$  -  $S_{D_{eff}}(w) = \frac{\partial \ln D_{eff}}{\partial \ln w} \Big|_{N_a,H}$ . Intervals upper limits are highlighted in bold letters.

| $N_a$ (cm <sup>-3</sup> ) \ $w$ (m s <sup>-1</sup> ) | <b>0.5</b>                    | <b>1</b>                      | <b>2</b>                      | <b>4</b>                      | <b>8</b>                      |
|------------------------------------------------------|-------------------------------|-------------------------------|-------------------------------|-------------------------------|-------------------------------|
| <b>500</b>                                           | 0.33<br>R <sup>2</sup> = 0.98 | 0.27<br>R <sup>2</sup> = 0.92 | 0.31<br>R <sup>2</sup> = 0.85 | 0.32<br>R <sup>2</sup> = 0.92 | -                             |
| <b>1000</b>                                          | 0.35<br>R <sup>2</sup> = 0.98 | 0.32<br>R <sup>2</sup> = 0.99 | 0.30<br>R <sup>2</sup> = 0.95 | 0.32<br>R <sup>2</sup> = 1.00 | 0.41<br>R <sup>2</sup> = 0.94 |
| <b>3000</b>                                          | 0.14<br>R <sup>2</sup> = 0.62 | 0.23<br>R <sup>2</sup> = 0.90 | 0.28<br>R <sup>2</sup> = 0.96 | 0.26<br>R <sup>2</sup> = 0.97 | 0.27<br>R <sup>2</sup> = 0.96 |
| <b>4500</b>                                          | 0.19<br>R <sup>2</sup> = 0.95 | 0.24<br>R <sup>2</sup> = 0.98 | 0.24<br>R <sup>2</sup> = 0.99 | 0.26<br>R <sup>2</sup> = 0.97 | -                             |

**Table S3.** sensitivities of  $D_{eff}$  to  $H$  -  $S_{D_{eff}}(H) = \frac{\partial \ln D_{eff}}{\partial \ln H} \Big|_{N_a, w}$ . Intervals upper limits are highlighted in bold letters.

| $w$ (m s <sup>-1</sup> ) \ $H$ (m) | <b>200</b>                    | <b>500</b>                    | <b>950</b>                     | <b>1625</b>                   | <b>2637.5</b>                    | <b>4156.25</b>                |
|------------------------------------|-------------------------------|-------------------------------|--------------------------------|-------------------------------|----------------------------------|-------------------------------|
| <b>0.5</b>                         | 0.69<br>R <sup>2</sup> = 0.97 | 0.75<br>R <sup>2</sup> = 0.82 | 1.23<br>R <sup>2</sup> = 0.89  | 0.64<br>R <sup>2</sup> = 0.86 | -0.069<br>R <sup>2</sup> = 0.011 | 1.24<br>R <sup>2</sup> = 0.83 |
| <b>1</b>                           | 0.67<br>R <sup>2</sup> = 0.90 | 0.79<br>R <sup>2</sup> = 0.87 | 0.90<br>R <sup>2</sup> = 1.00  | 0.87<br>R <sup>2</sup> = 0.88 | 0.70<br>R <sup>2</sup> = 1.00    | 1.11<br>R <sup>2</sup> = 0.95 |
| <b>2</b>                           | 0.72<br>R <sup>2</sup> = 0.84 | 0.89<br>R <sup>2</sup> = 0.98 | 1.049<br>R <sup>2</sup> = 0.94 | 0.87<br>R <sup>2</sup> = 0.92 | 0.90<br>R <sup>2</sup> = 0.92    | 1.40<br>R <sup>2</sup> = 0.96 |
| <b>4</b>                           | 0.54<br>R <sup>2</sup> = 0.62 | 0.85<br>R <sup>2</sup> = 0.95 | 0.79<br>R <sup>2</sup> = 0.99  | 0.49<br>R <sup>2</sup> = 0.37 | 0.72<br>R <sup>2</sup> = 0.92    | 1.22<br>R <sup>2</sup> = 0.98 |
| <b>8</b>                           | -                             | -                             | -                              | -                             | 0.94<br>R <sup>2</sup> = 1.00    | 0.83<br>R <sup>2</sup> = 0.98 |

**Table S4.** sensitivities of  $N_d$  to  $N_a$  -  $S_{N_d}(N_a) = \frac{\partial \ln N_d}{\partial \ln N_a} \Big|_{w, H}$ . Intervals upper limits are highlighted in bold letters.

5

10

| $N_a$ (cm <sup>-3</sup> ) \ $H$ (m) | <b>200</b>                    | <b>500</b>                    | <b>950</b>                    | <b>1625</b>                     | <b>2637.5</b>                  | <b>4156.25</b>                |
|-------------------------------------|-------------------------------|-------------------------------|-------------------------------|---------------------------------|--------------------------------|-------------------------------|
| <b>500</b>                          | 0.57<br>R <sup>2</sup> = 1.00 | 0.46<br>R <sup>2</sup> = 0.89 | 0.86<br>R <sup>2</sup> = 0.97 | -0.12<br>R <sup>2</sup> = 0.070 | 0.40<br>R <sup>2</sup> = 0.76  | -                             |
| <b>1000</b>                         | 0.45<br>R <sup>2</sup> = 0.91 | 0.44<br>R <sup>2</sup> = 0.99 | 0.34<br>R <sup>2</sup> = 0.47 | 0.32<br>R <sup>2</sup> = 0.89   | 0.29<br>R <sup>2</sup> = 0.91  | 0.64<br>R <sup>2</sup> = 0.89 |
| <b>3000</b>                         | 0.61<br>R <sup>2</sup> = 0.94 | 0.85<br>R <sup>2</sup> = 0.96 | -                             | 0.37<br>R <sup>2</sup> = 0.82   | 0.39<br>R <sup>2</sup> = 0.95  | 0.65<br>R <sup>2</sup> = 0.92 |
| <b>4500</b>                         | 0.24<br>R <sup>2</sup> = 0.91 | 0.30<br>R <sup>2</sup> = 0.89 | 0.41<br>R <sup>2</sup> = 0.67 | -0.37<br>R <sup>2</sup> = 0.46  | 1.034<br>R <sup>2</sup> = 0.70 | 0.38<br>R <sup>2</sup> = 0.90 |

**Table S5.** sensitivities of  $N_d$  to  $w$  -  $S_{N_d}(w) = \frac{\partial \ln N_d}{\partial \ln w} \Big|_{N_a, H}$ . Intervals upper limits are highlighted in bold letters.

| $N_a$ (cm <sup>-3</sup> ) \ $w$ (m s <sup>-1</sup> ) | <b>0.5</b>                      | <b>1</b>                       | <b>2</b>                        | <b>4</b>                         | <b>8</b>                       |
|------------------------------------------------------|---------------------------------|--------------------------------|---------------------------------|----------------------------------|--------------------------------|
| <b>500</b>                                           | 0.20<br>R <sup>2</sup> = 0.11   | -0.29<br>R <sup>2</sup> = 0.97 | -0.084<br>R <sup>2</sup> = 0.20 | -0.094<br>R <sup>2</sup> = 0.080 | -                              |
| <b>1000</b>                                          | -0.24<br>R <sup>2</sup> = 0.36  | -0.21<br>R <sup>2</sup> = 0.24 | -0.22<br>R <sup>2</sup> = 0.21  | -0.26<br>R <sup>2</sup> = 0.54   | -0.15<br>R <sup>2</sup> = 0.64 |
| <b>3000</b>                                          | -0.11<br>R <sup>2</sup> = 0.97  | -0.14<br>R <sup>2</sup> = 0.26 | -0.22<br>R <sup>2</sup> = 0.94  | -0.32<br>R <sup>2</sup> = 0.89   | -0.26<br>R <sup>2</sup> = 0.85 |
| <b>4500</b>                                          | -0.26<br>R <sup>2</sup> = 0.094 | 0.068<br>R <sup>2</sup> = 0.14 | 0.075<br>R <sup>2</sup> = 0.056 | 0.081<br>R <sup>2</sup> = 0.022  | -                              |

**Table S6.** sensitivities of  $N_d$  to  $H$  -  $S_{N_d}(H) = \frac{\partial \ln N_d}{\partial \ln H} \Big|_{N_a, w}$ . Intervals upper limits are highlighted in bold letters.

5

10



| $w$ (m s <sup>-1</sup> ) \ $H$ (m) | <b>200</b>              | <b>500</b>              | <b>950</b>             | <b>1625</b>            | <b>2637.5</b>          | <b>4156.25</b>          |
|------------------------------------|-------------------------|-------------------------|------------------------|------------------------|------------------------|-------------------------|
| <b>0.5</b>                         | 0.30                    | -0.11                   | 0.48                   | -0.022                 | -1.11                  | 0.058                   |
|                                    | R <sup>2</sup> = 0.97   | R <sup>2</sup> = 0.070  | R <sup>2</sup> = 0.66  | R <sup>2</sup> = 0.013 | R <sup>2</sup> = 0.82  | R <sup>2</sup> = 0.0052 |
| <b>1</b>                           | 0.24                    | -0.030                  | 0.055                  | 0.43                   | 0.024                  | 0.62                    |
|                                    | R <sup>2</sup> = 0.40   | R <sup>2</sup> = 0.0072 | R <sup>2</sup> = 0.42  | R <sup>2</sup> = 0.50  | R <sup>2</sup> = 0.12  | R <sup>2</sup> = 0.90   |
| <b>2</b>                           | 0.22                    | 0.021                   | 0.23                   | 0.41                   | -0.043                 | 0.60                    |
|                                    | R <sup>2</sup> = 0.26   | R <sup>2</sup> = 0.019  | R <sup>2</sup> = 0.21  | R <sup>2</sup> = 0.34  | R <sup>2</sup> = 0.097 | R <sup>2</sup> = 0.41   |
| <b>4</b>                           | 0.032                   | -0.025                  | 0.015                  | -0.42                  | -0.12                  | 0.20                    |
|                                    | R <sup>2</sup> = 0.0033 | R <sup>2</sup> = 0.0067 | R <sup>2</sup> = 0.054 | R <sup>2</sup> = 0.25  | R <sup>2</sup> = 0.29  | R <sup>2</sup> = 0.98   |
| <b>8</b>                           | -                       | -                       | -                      | -                      | 0.15                   | -0.20                   |
|                                    |                         |                         |                        |                        | R <sup>2</sup> = 0.17  | R <sup>2</sup> = 0.90   |

**Table S7.** sensitivities of  $LWC$  to  $N_a$  -  $S_{LWC}(N_a) = \frac{\partial \ln LWC}{\partial \ln N_a} \Big|_{w,H}$ . Intervals upper limits are highlighted in bold letters.

| $N_a$ (cm <sup>-3</sup> ) \ $H$ (m) | <b>200</b>            | <b>500</b>            | <b>950</b>            | <b>1625</b>             | <b>2637.5</b>         | <b>4156.25</b>        |
|-------------------------------------|-----------------------|-----------------------|-----------------------|-------------------------|-----------------------|-----------------------|
| <b>500</b>                          | 0.62                  | 0.60                  | 1.024                 | 0.060                   | 0.34                  | -                     |
|                                     | R <sup>2</sup> = 1.00 | R <sup>2</sup> = 0.85 | R <sup>2</sup> = 0.98 | R <sup>2</sup> = 0.0047 | R <sup>2</sup> = 0.91 |                       |
| <b>1000</b>                         | 0.50                  | 0.42                  | 0.37                  | 0.42                    | 0.31                  | 0.69                  |
|                                     | R <sup>2</sup> = 0.87 | R <sup>2</sup> = 0.90 | R <sup>2</sup> = 0.43 | R <sup>2</sup> = 0.88   | R <sup>2</sup> = 0.85 | R <sup>2</sup> = 0.75 |
| <b>3000</b>                         | 0.70                  | 0.94                  | -                     | 0.33                    | 0.70                  | 0.89                  |
|                                     | R <sup>2</sup> = 0.97 | R <sup>2</sup> = 0.94 |                       | R <sup>2</sup> = 0.72   | R <sup>2</sup> = 0.96 | R <sup>2</sup> = 0.87 |
| <b>4500</b>                         | 0.10                  | 0.33                  | 0.53                  | -0.47                   | 1.00                  | 0.42                  |
|                                     | R <sup>2</sup> = 0.44 | R <sup>2</sup> = 0.84 | R <sup>2</sup> = 0.70 | R <sup>2</sup> = 0.64   | R <sup>2</sup> = 0.66 | R <sup>2</sup> = 0.81 |

**Table S8.** sensitivities of  $LWC$  to  $w$  -  $S_{LWC}(w) = \frac{\partial \ln LWC}{\partial \ln w} \Big|_{N_a,H}$ . Intervals upper limits are highlighted in bold letters.

5

10

| $N_a$ (cm <sup>-3</sup> ) \ $w$ (m s <sup>-1</sup> ) | <b>0.5</b>                    | <b>1</b>                      | <b>2</b>                      | <b>4</b>                      | <b>8</b>                       |
|------------------------------------------------------|-------------------------------|-------------------------------|-------------------------------|-------------------------------|--------------------------------|
| <b>500</b>                                           | 1.14<br>R <sup>2</sup> = 0.83 | 0.27<br>R <sup>2</sup> = 0.45 | 0.74<br>R <sup>2</sup> = 0.62 | 0.80<br>R <sup>2</sup> = 0.84 | -                              |
| <b>1000</b>                                          | 0.73<br>R <sup>2</sup> = 0.92 | 0.69<br>R <sup>2</sup> = 0.90 | 0.65<br>R <sup>2</sup> = 0.65 | 0.71<br>R <sup>2</sup> = 0.92 | 1.062<br>R <sup>2</sup> = 0.79 |
| <b>3000</b>                                          | 0.51<br>R <sup>2</sup> = 0.61 | 0.58<br>R <sup>2</sup> = 0.76 | 0.64<br>R <sup>2</sup> = 0.95 | 0.48<br>R <sup>2</sup> = 0.92 | 0.52<br>R <sup>2</sup> = 0.86  |
| <b>4500</b>                                          | 0.36<br>R <sup>2</sup> = 0.16 | 0.77<br>R <sup>2</sup> = 0.98 | 0.70<br>R <sup>2</sup> = 0.83 | 0.76<br>R <sup>2</sup> = 0.62 | -                              |

**Table S9.** sensitivities of  $LWC$  to  $H$  -  $S_{LWC}(H) = \left. \frac{\partial \ln LWC}{\partial \ln H} \right|_{N_a, w}$ . Intervals upper limits are highlighted in bold letters.

| $w$ (m s <sup>-1</sup> ) \ $H$ (m) | <b>200</b>                     | <b>500</b>                     | <b>950</b>                     | <b>1625</b>                   | <b>2637.5</b>                 | <b>4156.25</b>                 |
|------------------------------------|--------------------------------|--------------------------------|--------------------------------|-------------------------------|-------------------------------|--------------------------------|
| <b>0.5</b>                         | -0.25<br>R <sup>2</sup> = 0.50 | 0.20<br>R <sup>2</sup> = 0.50  | 0.51<br>R <sup>2</sup> = 0.70  | 0.43<br>R <sup>2</sup> = 0.74 | 0.53<br>R <sup>2</sup> = 0.87 | 0.54<br>R <sup>2</sup> = 0.40  |
| <b>1</b>                           | -0.33<br>R <sup>2</sup> = 0.76 | 0.12<br>R <sup>2</sup> = 0.17  | 0.62<br>R <sup>2</sup> = 0.87  | 0.37<br>R <sup>2</sup> = 0.87 | 0.37<br>R <sup>2</sup> = 62   | 0.74<br>R <sup>2</sup> = 0.86  |
| <b>2</b>                           | -0.42<br>R <sup>2</sup> = 0.93 | 0.11<br>R <sup>2</sup> = 0.28  | 0.40<br>R <sup>2</sup> = 0.91  | 0.40<br>R <sup>2</sup> = 0.66 | 0.51<br>R <sup>2</sup> = 0.86 | 0.069<br>R <sup>2</sup> = 0.13 |
| <b>4</b>                           | -0.54<br>R <sup>2</sup> = 0.97 | -0.15<br>R <sup>2</sup> = 0.39 | 0.062<br>R <sup>2</sup> = 0.20 | 0.29<br>R <sup>2</sup> = 0.36 | 0.56<br>R <sup>2</sup> = 0.88 | 0.14<br>R <sup>2</sup> = 0.18  |
| <b>8</b>                           | -                              | -                              | -                              | -                             | 0.52<br>R <sup>2</sup> = 0.99 | 0.090<br>R <sup>2</sup> = 0.93 |

**Table S10.** sensitivities of  $\Lambda$  to  $N_a$  -  $S_{\Lambda}(N_a) = \left. \frac{\partial \ln \Lambda}{\partial \ln N_a} \right|_{w, H}$ . Intervals upper limits are highlighted in bold letters.

5

10

| $N_a$ (cm <sup>-3</sup> ) \ $H$ (m) | <b>200</b>                       | <b>500</b>                        | <b>950</b>                      | <b>1625</b>                     | <b>2637.5</b>                     | <b>4156.25</b>                 |
|-------------------------------------|----------------------------------|-----------------------------------|---------------------------------|---------------------------------|-----------------------------------|--------------------------------|
| <b>500</b>                          | 0.35<br>R <sup>2</sup> = 0.98    | 0.35<br>R <sup>2</sup> = 0.65     | 0.41<br>R <sup>2</sup> = 0.66   | 0.049<br>R <sup>2</sup> = 0.14  | -0.090<br>R <sup>2</sup> = 0.98   | -                              |
| <b>1000</b>                         | 0.061<br>R <sup>2</sup> = 0.24   | 0.0043<br>R <sup>2</sup> = 0.0037 | -0.062<br>R <sup>2</sup> = 0.11 | 0.19<br>R <sup>2</sup> = 0.67   | -0.11<br>R <sup>2</sup> = 0.75    | 0.24<br>R <sup>2</sup> = 0.82  |
| <b>3000</b>                         | -0.062<br>R <sup>2</sup> = 0.31  | 0.13<br>R <sup>2</sup> = 0.55     | -                               | 0.015<br>R <sup>2</sup> = 0.045 | -0.14<br>R <sup>2</sup> = 0.83    | -0.15<br>R <sup>2</sup> = 0.42 |
| <b>4500</b>                         | -0.0064<br>R <sup>2</sup> = 0.13 | -0.11<br>R <sup>2</sup> = 0.91    | -0.097<br>R <sup>2</sup> = 0.82 | -0.18<br>R <sup>2</sup> = 0.23  | 0.0068<br>R <sup>2</sup> = 0.0089 | 0.049<br>R <sup>2</sup> = 0.56 |

**Table S11.** sensitivities of  $\Lambda$  to  $w$  -  $S_{\Lambda}(w) = \left. \frac{\partial \ln \Lambda}{\partial \ln w} \right|_{N_a, H}$ . Intervals upper limits are highlighted in bold letters.

| $N_a$ (cm <sup>-3</sup> ) \ $w$ (m s <sup>-1</sup> ) | <b>0.5</b>                      | <b>1</b>                       | <b>2</b>                       | <b>4</b>                       | <b>8</b>                        |
|------------------------------------------------------|---------------------------------|--------------------------------|--------------------------------|--------------------------------|---------------------------------|
| <b>500</b>                                           | -0.75<br>R <sup>2</sup> = 0.96  | -0.84<br>R <sup>2</sup> = 0.94 | -0.94<br>R <sup>2</sup> = 0.98 | -1.11<br>R <sup>2</sup> = 0.97 | -                               |
| <b>1000</b>                                          | -0.61<br>R <sup>2</sup> = 0.98  | -0.63<br>R <sup>2</sup> = 0.96 | -0.47<br>R <sup>2</sup> = 0.87 | -0.54<br>R <sup>2</sup> = 0.86 | -0.25<br>R <sup>2</sup> = 0.073 |
| <b>3000</b>                                          | -0.10<br>R <sup>2</sup> = 0.088 | -0.17<br>R <sup>2</sup> = 0.48 | -0.25<br>R <sup>2</sup> = 0.54 | -0.21<br>R <sup>2</sup> = 0.34 | -0.26<br>R <sup>2</sup> = 0.38  |
| <b>4500</b>                                          | -0.17<br>R <sup>2</sup> = 0.47  | -0.15<br>R <sup>2</sup> = 0.43 | -0.15<br>R <sup>2</sup> = 0.50 | -0.14<br>R <sup>2</sup> = 0.62 | -                               |

**Table S12.** sensitivities of  $\Lambda$  to  $H$  -  $S_{\Lambda}(H) = \left. \frac{\partial \ln \Lambda}{\partial \ln H} \right|_{N_a, w}$ . Intervals upper limits are highlighted in bold letters.

5

10

| $w$ (m s <sup>-1</sup> ) \ $H$ (m) | <b>200</b>                    | <b>500</b>                      | <b>950</b>                       | <b>1625</b>                     | <b>2637.5</b>                   | <b>4156.25</b>                    |
|------------------------------------|-------------------------------|---------------------------------|----------------------------------|---------------------------------|---------------------------------|-----------------------------------|
| <b>0.5</b>                         | 0.17<br>R <sup>2</sup> = 0.81 | 0.013<br>R <sup>2</sup> = 0.014 | -0.17<br>R <sup>2</sup> = 0.45   | -0.12<br>R <sup>2</sup> = 0.66  | -0.097<br>R <sup>2</sup> = 0.56 | -0.097<br>R <sup>2</sup> = 0.36   |
| <b>1</b>                           | 0.21<br>R <sup>2</sup> = 0.93 | 0.066<br>R <sup>2</sup> = 0.21  | -0.19<br>R <sup>2</sup> = 0.75   | -0.11<br>R <sup>2</sup> = 0.80  | -0.080<br>R <sup>2</sup> = 38   | -0.24<br>R <sup>2</sup> = 0.77    |
| <b>2</b>                           | 0.30<br>R <sup>2</sup> = 0.95 | 0.027<br>R <sup>2</sup> = 0.068 | -0.12<br>R <sup>2</sup> = 0.98   | -0.14<br>R <sup>2</sup> = 0.50  | -0.14<br>R <sup>2</sup> = 0.72  | 0.036<br>R <sup>2</sup> = 0.090   |
| <b>4</b>                           | 0.44<br>R <sup>2</sup> = 1.00 | 0.091<br>R <sup>2</sup> = 0.24  | 0.0092<br>R <sup>2</sup> = 0.018 | -0.072<br>R <sup>2</sup> = 0.12 | -0.17<br>R <sup>2</sup> = 0.70  | 0.0031<br>R <sup>2</sup> = 0.0012 |
| <b>8</b>                           | -                             | -                               | -                                | -                               | -0.18<br>R <sup>2</sup> = 0.94  | 0.16<br>R <sup>2</sup> = 0.95     |

**Table S13.** sensitivities of  $\varepsilon$  to  $N_a$  -  $S_\varepsilon(N_a) = \left. \frac{\partial \ln \varepsilon}{\partial \ln N_a} \right|_{w,H}$ . Intervals upper limits are highlighted in bold letters.

| $N_a$ (cm <sup>-3</sup> ) \ $H$ (m) | <b>200</b>                      | <b>500</b>                      | <b>950</b>                     | <b>1625</b>                          | <b>2637.5</b>                     | <b>4156.25</b>                  |
|-------------------------------------|---------------------------------|---------------------------------|--------------------------------|--------------------------------------|-----------------------------------|---------------------------------|
| <b>500</b>                          | -0.29<br>R <sup>2</sup> = 0.95  | -0.11<br>R <sup>2</sup> = 0.60  | -0.19<br>R <sup>2</sup> = 0.80 | 0.015<br>R <sup>2</sup> = 0.057      | 0.063<br>R <sup>2</sup> = 1.00    | -                               |
| <b>1000</b>                         | -0.080<br>R <sup>2</sup> = 0.41 | -0.016<br>R <sup>2</sup> = 0.71 | 0.076<br>R <sup>2</sup> = 0.34 | -0.12<br>R <sup>2</sup> = 0.78       | 0.049<br>R <sup>2</sup> = 0.53    | -0.14<br>R <sup>2</sup> = 0.86  |
| <b>3000</b>                         | 0.037<br>R <sup>2</sup> = 0.31  | -0.17<br>R <sup>2</sup> = 0.76  | -                              | 0.00013<br>R <sup>2</sup> = 0.000024 | 0.0024<br>R <sup>2</sup> = 0.0019 | -0.035<br>R <sup>2</sup> = 0.22 |
| <b>4500</b>                         | 0.027<br>R <sup>2</sup> = 0.51  | 0.037<br>R <sup>2</sup> = 0.61  | 0.024<br>R <sup>2</sup> = 0.53 | 0.018<br>R <sup>2</sup> = 0.30       | -0.025<br>R <sup>2</sup> = 0.27   | -0.023<br>R <sup>2</sup> = 0.28 |

**Table S14.** sensitivities of  $\varepsilon$  to  $w$  -  $S_\varepsilon(w) = \left. \frac{\partial \ln \varepsilon}{\partial \ln w} \right|_{N_a,H}$ . Intervals upper limits are highlighted in bold letters.

5

10

| $N_a$ (cm <sup>-3</sup> ) \ $w$ (m s <sup>-1</sup> ) | <b>0.5</b>                        | <b>1</b>                         | <b>2</b>                        | <b>4</b>                        | <b>8</b>                         |
|------------------------------------------------------|-----------------------------------|----------------------------------|---------------------------------|---------------------------------|----------------------------------|
| <b>500</b>                                           | 0.22<br>R <sup>2</sup> = 0.85     | 0.30<br>R <sup>2</sup> = 0.73    | 0.36<br>R <sup>2</sup> = 0.94   | 0.48<br>R <sup>2</sup> = 0.99   | -                                |
| <b>1000</b>                                          | 0.15<br>R <sup>2</sup> = 0.79     | 0.16<br>R <sup>2</sup> = 0.82    | 0.094<br>R <sup>2</sup> = 0.63  | 0.16<br>R <sup>2</sup> = 0.74   | -0.16<br>R <sup>2</sup> = 0.084  |
| <b>3000</b>                                          | 0.0066<br>R <sup>2</sup> = 0.0045 | 0.0093<br>R <sup>2</sup> = 0.030 | 0.017<br>R <sup>2</sup> = 0.046 | 0.028<br>R <sup>2</sup> = 0.032 | 0.010<br>R <sup>2</sup> = 0.0024 |
| <b>4500</b>                                          | -0.022<br>R <sup>2</sup> = 0.062  | -0.037<br>R <sup>2</sup> = 0.20  | -0.036<br>R <sup>2</sup> = 0.17 | -0.046<br>R <sup>2</sup> = 0.29 | -                                |

**Table S15.** sensitivities of  $\varepsilon$  to  $H$  -  $S_\varepsilon(H) = \frac{\partial \ln \varepsilon}{\partial \ln H} \Big|_{N_a, w}$ . Intervals upper limits are highlighted in bold letters.

| $w$ (m s <sup>-1</sup> ) \ $H$ (m) | <b>200</b> | <b>500</b> | <b>950</b> | <b>1625</b> | <b>2637.5</b> | <b>4156.25</b> |
|------------------------------------|------------|------------|------------|-------------|---------------|----------------|
| <b>0.5</b>                         | 289        | 89         | 21         | 32          | 36            | 45             |
| <b>1</b>                           | 247        | 82         | 20         | 24          | 22            | 45             |
| <b>2</b>                           | 223        | 87         | 26         | 34          | 28            | 49             |
| <b>4</b>                           | 111        | 47         | 30         | 37          | 29            | 38             |
| <b>8</b>                           | 0          | 0          | 0          | 0           | 18            | 27             |

**Table S16.** number of 1 Hz DSD data for the sensitivities to  $N_a$ .

| $N_a$ (cm <sup>-3</sup> ) \ $H$ (m) | <b>200</b> | <b>500</b> | <b>950</b> | <b>1625</b> | <b>2637.5</b> | <b>4156.25</b> |
|-------------------------------------|------------|------------|------------|-------------|---------------|----------------|
| <b>500</b>                          | 259        | 84         | 28         | 27          | 11            | 0              |
| <b>1000</b>                         | 234        | 84         | 38         | 40          | 56            | 81             |
| <b>3000</b>                         | 265        | 91         | 0          | 61          | 43            | 75             |
| <b>4500</b>                         | 125        | 55         | 25         | 16          | 23            | 44             |

5 **Table S17.** number of 1 Hz DSD data for the sensitivities to  $w$ .

| $N_a$ (cm <sup>-3</sup> ) \ $w$ (m s <sup>-1</sup> ) | <b>0.5</b> | <b>1</b> | <b>2</b> | <b>4</b> | <b>8</b> |
|------------------------------------------------------|------------|----------|----------|----------|----------|
| <b>500</b>                                           | 169        | 119      | 90       | 35       | 0        |
| <b>1000</b>                                          | 137        | 136      | 146      | 94       | 20       |
| <b>3000</b>                                          | 142        | 100      | 138      | 110      | 51       |
| <b>4500</b>                                          | 64         | 85       | 73       | 53       | 0        |

**Table S18.** number of 1 Hz DSD data for the sensitivities to  $H$ .
